# Supplementary material for: PEST sequences in the malaria parasite Plasmodium falciparum: a genomic study
Source: Springer Nature journal article supplement (doi:10.1186/1475-2875-2-16), 2003-06-23
Supplement: Additional file 1 [file 1475-2875-2-16-s1.doc]

Supplemental material

Pest sequences in *P falciparum* – a genomic study.

The sequence annotated as MLA13P1.310 is

5' exon sequence:

ATG GG

Intron sequence

G TGT ATA AAT AGC AAA GTA AAA GAG AAA AGA AAA ATA AAA AAA AGA AAA AAG

3’exon not shown.

The published “intron” is unlikely to be an intron for the following reasons

(1) The five prime splice site (5’ GTGT) is atypical. This in *P. falciparum*

is usually 5’ GTAA.

(2) There is no 3’ pyrimidine tract before the 3’ AG. Again this is very atypical

(3) There are no “intron signatures” present – for example runs of (TA)n

(4) The purine content is too high: there are 7 pyrimidines and 45 purines (86.5%). This is usually < 50%.

(5) There is no subsequence resembling a branch (lariat) site within the intron. (Mitchell, unpublished work).

(6) Minor points: The intron is in phase 2 – occurs in only 20% of introns - and it is relatively short (52 bases) - most known introns in *P. falciparum* are > 70 bases.

Some of these features might be present in an intron but it is extremely unlikely that all would be present in simultaneously.

The A AAA AAG at the3’ end of the “intron” is a typical “slippery” sequence [1] and tends to give rise to -1 frameshifts. In addition, these very AT rich runs are very difficult to sequence without occasional errors.

Reference

1. Farabaugh PJ: **Programmed translational frameshifting**. *Ann Rev Genetics* 1995, **30:** 507-528**.**
